# Supplementary material
Source: publisher site journal article supplement (https://www.dovepress.com/article/283986)
Supplement: Supplementary file 1 [file get_supplementary_file.php]

A

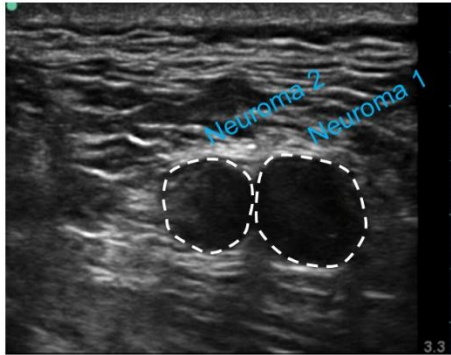

B

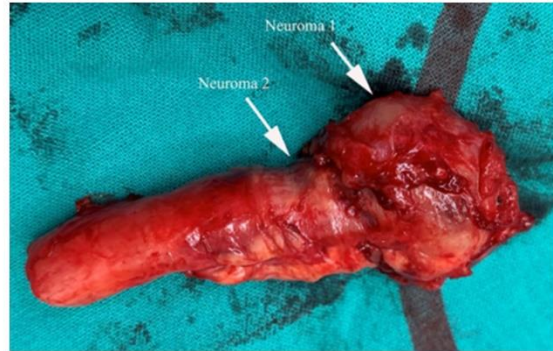

Supplementary Figure 1. Characteristics of painful neuroma in an amputee. A: Preoperative ultrasound showed two neuromas on one nerve. B: The results of postoperative specimen were consistent with preoperative ultrasonography.
